# Supplementary material
Source: PubMed Central journal article supplement (PMC4406861)
Supplement: NIHMS671250-supplement-2.pdf [file NIHMS671250-supplement-2.pdf]

**Supplementary Table 1.** List of 257 putative positive regulators of TLR7 signaling. Known TLR pathways genes and *Trem14* shaded.

| Gene   | Accession #  | TRC name       | shRNA sequence        | LFC  | P-value |
|--------|--------------|----------------|-----------------------|------|---------|
| Ncoa1  | NM_010881    | TRCN0000095571 | CGCCGAAATAGCCATACATTT | 4.31 | 0.037   |
| Myd88  | NM_010851    | TRCN0000077234 | GCCAGCGAGCTAATTGAGAAA | 4.16 | 0.047   |
| Mthfd2 | NM_008638    | TRCN0000041814 | CACTCCTATGTTCTCAACAAA | 4.16 | 0.015   |
| Plaur  | NM_011113    | TRCN0000088821 | CTTCGGGAATGGCAAGATGAT | 4.14 | 0.006   |
| Trpv4  | NM_022017    | TRCN0000068621 | CCTGGAGACAGTTCTCAACAA | 4.04 | 0.043   |
| Pak7   | NM_172858    | TRCN0000025172 | CCTGCAAACCAGTTCTCAGTA | 3.90 | 0.026   |
| Trim52 | NM_198601    | TRCN0000040822 | GCCAGATTTGCCATACTCCAT | 3.55 | 0.010   |
| Oplah  | NM_153122    | TRCN0000098846 | GTCCTGTGCAAGTCATAATT  | 3.53 | 0.025   |
| Dad1   | NM_010015    | TRCN0000093703 | GCAGCTTCATCCTAGCGGTTT | 3.51 | 0.030   |
| Gria3  | NM_016886    | TRCN0000102933 | CCTGGAGTCAAGGAATTGATA | 3.43 | 0.025   |
| Trem14 | NM_172623    | TRCN0000100963 | AGAAGTAACTGTTCTCAGAAA | 3.42 | 0.012   |
| Pbk    | NM_023209    | TRCN0000026752 | GTCAGCGTTTACCTAATGAAA | 3.41 | 0.006   |
| Bsg    | NM_009768    | TRCN0000054861 | GCAATCACCAATAGCACTGAA | 3.38 | 0.006   |
| Fcer1g | NM_010185    | TRCN0000067589 | CAGCTCTGCTATATCCTGGAT | 3.36 | 0.0001  |
| Dsg3   | NM_030596    | TRCN0000094964 | CCAAGCATCTTCACATTCTA  | 3.35 | 0.020   |
| Nek10  | XM_138906    | TRCN0000027634 | GCAACCCATGTAACCTGAAAT | 3.25 | 0.036   |
| Pkia   | NM_008862    | TRCN0000012467 | GAACAGGTAGAAGAAATGCAA | 3.24 | 0.038   |
| Foxq1  | NM_008239    | TRCN0000081535 | CATCGACAGCATTCTCAGCAA | 3.23 | 0.027   |
| Ren2   | NM_031193    | TRCN0000030481 | CCAGACCTCAAAGTCATGTT  | 3.21 | 0.016   |
| Grhl3  | NM_001013756 | TRCN0000103549 | CCAGAAGTTTCCCTACAGTAA | 3.19 | 0.002   |
| V2r16  | NM_009491    | TRCN0000104889 | GCAGCAGTTGAGGGACCTACT | 3.18 | 0.004   |
| Zic5   | NM_022987    | TRCN0000095154 | CCATGTCTAACCTGAAACAA  | 3.15 | 0.003   |
| Sbk1   | NM_145587    | TRCN0000088466 | CGATGTTACCAAGCACTATGA | 3.14 | 0.022   |
| Pdgrfb | NM_008809    | TRCN0000078768 | CCATGCTTAATGAATGCTGTT | 3.13 | 0.001   |
| Pik3r1 | NM_011085    | TRCN0000068193 | CGAAGCATTTAATGAAACCAT | 3.13 | 0.009   |
| Bid    | NM_007544    | TRCN0000009704 | CCACACGACTGTCAACTTTAT | 3.07 | 0.014   |
| Zfp46  | NM_009557    | TRCN0000084586 | GCATCCGCTACCACATTGTT  | 3.06 | 0.025   |
| LincR  | NM_153408    | TRCN0000040863 | CCAGAGTCTGAAGTCATATCA | 3.06 | 0.049   |
| Sap30  | NM_021788    | TRCN0000095845 | CCAGGTCTAAATAAAGCACAA | 3.03 | 0.036   |
| Tlr7   | NM_133211    | TRCN0000065987 | CCTCTTCAGAAGTCTAAGTTT | 2.99 | 0.011   |
| Nfe2l2 | NM_010902    | TRCN0000054661 | GAAGGCACAATGGAATTCAAT | 2.99 | 0.052   |
| Myd88  | NM_010851    | TRCN0000077236 | GCGACTGATTCCCTATTAATA | 2.99 | 0.036   |
| Tcf2   | NM_009330    | TRCN0000055295 | GCTACAGAACTCCCACATGTA | 2.99 | 0.049   |
| Melk   | NM_010790    | TRCN0000024068 | GCAGCTCCTGAACATAACAA  | 2.99 | 0.005   |
| Sp9    | NM_001005343 | TRCN0000096400 | CCCTGTGTGCAACAAGCGTTT | 2.98 | 0.002   |
| Itgb3  | NM_016780    | TRCN0000009620 | GTCATCTGGAAGCTACTCAT  | 2.97 | 0.017   |
| Myd88  | NM_010851    | TRCN0000077235 | CCTTGTTAGACCGTGAGGATA | 2.94 | 0.031   |
| Lgals9 | NM_010708    | TRCN0000066441 | GATGGTGAACAAGAAATTCTT | 2.93 | 0.025   |
| Hadha  | NM_178878    | TRCN0000041348 | GCTGACCAGAACCCATATTAA | 2.88 | 0.034   |
| Slc5a9 | NM_145551    | TRCN0000079211 | CGTCGGAATACTGCGTATGAT | 2.88 | 0.007   |
| Dll1   | NM_007865    | TRCN0000028865 | CGCGAGAAGGACGTTTCTGTT | 2.86 | 0.003   |
| Kdelr2 | NM_025841    | TRCN0000093587 | GACCATTCTCTACTGCGACTT | 2.85 | 0.016   |
| Tollip | NM_023764    | TRCN0000066135 | CCTCGCTGGAACAAAGTCATT | 2.85 | 0.022   |
| Fcgr3  | NM_010188    | TRCN0000067729 | CACTGCTTTCTCCCTAGTGAT | 2.83 | 0.006   |
| Bat2   | NM_020027    | TRCN0000099503 | GCCTCCAAGTAAAGAACCTTT | 2.82 | 0.005   |
| Cpne3  | NM_027769    | TRCN0000077140 | GCAGACAGCTTCTCAATACTT | 2.80 | 0.010   |

|                  |           |                |                        |      |       |
|------------------|-----------|----------------|------------------------|------|-------|
| <b>Tnfsf7</b>    | NM_011617 | TRCN0000066683 | CATCTGCGTATCCATCAAGAT  | 2.80 | 0.007 |
| <b>Cdc6</b>      | NM_011799 | TRCN0000088451 | CGTAGACCAGTCTGAGTGTTT  | 2.80 | 0.028 |
| <b>St8sia3</b>   | NM_009182 | TRCN0000093995 | GCCCATTATGAATAAGCGTTA  | 2.77 | 0.021 |
| <b>Rpl22</b>     | NM_009079 | TRCN0000104276 | GCTGCGTACTTCCAGATTAA   | 2.74 | 0.003 |
| <b>Pthr2</b>     | NM_139270 | TRCN0000027963 | GCTAACTATTCAGACTGCTTT  | 2.74 | 0.004 |
| <b>Zbtb24</b>    | NM_153398 | TRCN0000095541 | CCAGTGCATGTCATCACACTT  | 2.73 | 0.039 |
| <b>Gosr1</b>     | NM_016810 | TRCN0000100756 | GCAGGATTATACACACGAATT  | 2.71 | 0.021 |
| <b>Adamts10</b>  | NM_172619 | TRCN0000032245 | CCCATGTAGTATACAAGCGTT  | 2.70 | 0.003 |
| <b>Pmfl</b>      | NM_025928 | TRCN0000096617 | GACGCAGAGGATCTATGACAA  | 2.70 | 0.034 |
| <b>Il6ra</b>     | NM_010559 | TRCN0000068293 | CGAAGCGTTTCACAGCTTAAA  | 2.69 | 0.007 |
| <b>Nsun6</b>     | NM_028950 | TRCN0000097438 | CCTGACATTGGAGCAATTGAA  | 2.69 | 0.023 |
| <b>Cst11</b>     | XM_283777 | TRCN0000092198 | CCAGTGTACTTCTCAGTGTA   | 2.68 | 0.035 |
| <b>Cugbp1</b>    | NM_198683 | TRCN0000098512 | CCCAGTACTTAGCACTTTATT  | 2.68 | 0.010 |
| <b>Usp1</b>      | NM_146144 | TRCN0000030770 | AGAGCCTTAGACTTTACTGAT  | 2.68 | 0.040 |
| <b>Chst11</b>    | NM_021439 | TRCN0000103334 | CCACGAACTCATCTACTGCTA  | 2.67 | 0.001 |
| <b>Tbx15</b>     | NM_011534 | TRCN0000084360 | CGCGTCTCAAAGCACTTTACT  | 2.67 | 0.021 |
| <b>Klf2</b>      | NM_008452 | TRCN0000081903 | GCAAACAGACTGCTATTTATT  | 2.67 | 0.038 |
| <b>Rpl14</b>     | NM_025974 | TRCN0000054835 | GATGACAGACTTTGATCGTTT  | 2.66 | 0.025 |
| <b>Usp12</b>     | NM_011669 | TRCN0000030776 | CAGTTCTTCAAGCACTTTATT  | 2.66 | 0.051 |
| <b>Tpte2</b>     | NM_016715 | TRCN0000065916 | CTTGAGAAGCATCACGGGAA   | 2.66 | 0.055 |
| <b>Vpreb2</b>    | NM_016983 | TRCN0000067380 | CCTGCTGAGATACTTCTCACA  | 2.66 | 0.050 |
| <b>Ece1</b>      | NM_199307 | TRCN0000031169 | GCCATCAACTGGTTACCCTTT  | 2.65 | 0.025 |
| <b>Hist1h1e</b>  | NM_015787 | TRCN0000096934 | CCTCATTTGAATACTGCGTAA  | 2.63 | 0.005 |
| <b>Llg1l</b>     | NM_008502 | TRCN0000088338 | CCAGTCATTCTAAAGCAGTTT  | 2.63 | 0.028 |
| <b>Zfp467</b>    | NM_020589 | TRCN0000085854 | CGAGAAACGTTTCCGCAAGAA  | 2.62 | 0.012 |
| <b>Spon1</b>     | NM_145584 | TRCN0000090520 | GCCAAGTACAGACTCACGTTT  | 2.62 | 0.008 |
| <b>F2rl1</b>     | NM_007974 | TRCN0000026630 | GCCAACTACAAATACTGCTTA  | 2.59 | 0.002 |
| <b>Rasgrp1</b>   | NM_011246 | TRCN0000077600 | CCTTGTAATAAGCTGCGTAAA  | 2.59 | 0.029 |
| <b>Irak2</b>     | NM_172161 | TRCN0000022500 | CCACAGGCTCATCTTCCAATA  | 2.59 | 0.037 |
| <b>Serpinb3c</b> | NM_201363 | TRCN0000080058 | GCATGATAACAGCACTAGGAA  | 2.59 | 0.013 |
| <b>Neurod1</b>   | NM_010894 | TRCN0000081773 | GCGTTGCCTTAGCACTTCTTT  | 2.58 | 0.019 |
| <b>Cyp2e1</b>    | NM_021282 | TRCN0000011872 | AGTGACTATTTCAAGGCGTTT  | 2.58 | 0.024 |
| <b>Pla2g2d</b>   | NM_011109 | TRCN0000076896 | CTACAATAAGCGCCTGCGTTA  | 2.56 | 0.009 |
| <b>Il12a</b>     | NM_008351 | TRCN0000066516 | CAGCACATTGAAGACCTGTTT  | 2.56 | 0.051 |
| <b>Wnt9b</b>     | NM_011719 | TRCN0000071851 | CGTGTATACCTGCAAGCGCTA  | 2.56 | 0.049 |
| <b>Slc6a15</b>   | NM_175328 | TRCN0000079718 | GCTTACATTGACTGAGGTCAT  | 2.55 | 0.027 |
| <b>Frmpd2</b>    | XM_193753 | TRCN0000080571 | CCTGATGACATGGAATTAATA  | 2.54 | 0.046 |
| <b>Adh5</b>      | NM_007410 | TRCN0000042037 | GCTGACATCTCTGTTGCTAAA  | 2.54 | 0.006 |
| <b>Rras</b>      | NM_009101 | TRCN0000077619 | TCAGCCAAACTGCGTCTGAAT  | 2.53 | 0.005 |
| <b>Slc5a3</b>    | NM_017391 | TRCN0000070092 | CCAGTAGATGCTTATTCCAAT  | 2.53 | 0.007 |
| <b>Elov12</b>    | NM_019423 | TRCN0000009784 | CACACTTCTTTCTGCGTATAT  | 2.52 | 0.033 |
| <b>Cited1</b>    | NM_007709 | TRCN0000095237 | TCAGAAGCTTAATAGCCAGTA  | 2.52 | 0.014 |
| <b>Rps3a</b>     | NM_016959 | TRCN0000104149 | AGAATGATGAAGTTGCGTTTA  | 2.51 | 0.030 |
| <b>Dhh</b>       | NM_007857 | TRCN0000031070 | CCTCTGCTATACAAGCAGTTT  | 2.51 | 0.010 |
| <b>Fgf9</b>      | NM_013518 | TRCN0000067767 | AGGAGATACTATGTTGCATTA  | 2.51 | 0.039 |
| <b>Cldn7</b>     | NM_016887 | TRCN0000091767 | CAGTGAAAGCAAAGCTGCGTA  | 2.50 | 0.004 |
| <b>Mxd4</b>      | NM_010753 | TRCN0000084707 | TCGCTTCTTAAAGAGACGTTT  | 2.49 | 0.016 |
| <b>P2rx3</b>     | NM_145526 | TRCN0000068635 | GCTGGCAAAGTTCAACATCATT | 2.48 | 0.005 |
| <b>Brca2</b>     | NM_009765 | TRCN0000071011 | CGGCGTTTCTAAAGAGTGAT   | 2.48 | 0.028 |
| <b>Tgif</b>      | NM_009372 | TRCN0000055048 | CCATTTCACTCTGCGTAGTT   | 2.47 | 0.003 |
| <b>Gosr1</b>     | NM_016810 | TRCN0000100758 | CAGGATTATACACACGAATTT  | 2.47 | 0.026 |

|                  |           |                |                       |      |       |
|------------------|-----------|----------------|-----------------------|------|-------|
| <b>Usp37</b>     | NM_176972 | TRCN0000030862 | CGCTTTGCAAACCTGCTTATT | 2.47 | 0.013 |
| <b>Bmp8a</b>     | NM_007558 | TRCN0000065758 | CCTGCGTAAACACCGTAACAT | 2.47 | 0.014 |
| <b>Nap113</b>    | NM_138742 | TRCN0000092904 | GCCTCTATATGATAAGCGTTT | 2.46 | 0.016 |
| <b>Plcb3</b>     | NM_008874 | TRCN0000076916 | CTGATGAGTTTCCCTTGGAAA | 2.46 | 0.015 |
| <b>Ntrk2</b>     | NM_008745 | TRCN0000023702 | GCTTACAAAGCGTTTCTGAAA | 2.46 | 0.011 |
| <b>Hs6st1</b>    | NM_015818 | TRCN0000103190 | CCCACCTATCAAAGCTGCTTT | 2.45 | 0.048 |
| <b>D4st1</b>     | NM_028117 | TRCN0000103346 | CCTGTCTGCTTACCGTAACAA | 2.45 | 0.001 |
| <b>Kcnb2</b>     | XM_136482 | TRCN0000069009 | CGCCAGGAGAAAGCTATTAAA | 2.45 | 0.042 |
| <b>Gykl1</b>     | NM_010293 | TRCN0000024626 | GCCTTCCAATCAGCACTTATT | 2.44 | 0.022 |
| <b>Klf15</b>     | NM_023184 | TRCN0000071469 | CCAAACCTATTGGCTCAGGAT | 2.43 | 0.048 |
| <b>Dpagt1</b>    | NM_007875 | TRCN0000093709 | GCCATCTGTGACTACTGATAT | 2.41 | 0.001 |
| <b>Prkg1</b>     | NM_011160 | TRCN0000022781 | CCAGAGATCATCCTGAACAAA | 2.41 | 0.047 |
| <b>Hist3h2bb</b> | NM_206882 | TRCN0000086410 | CGCGTTTCCGTAGTACAATA  | 2.41 | 0.005 |
| <b>Oprd1</b>     | NM_013622 | TRCN0000027801 | TGTGACCAAGATCTGCGTGTT | 2.40 | 0.020 |
| <b>Arhgap4</b>   | NM_138630 | TRCN0000071701 | CCTACGCTATCTCTTCACCTT | 2.40 | 0.012 |
| <b>Tia1</b>      | NM_011585 | TRCN0000077162 | CAGGAAATGACCCATACTGTT | 2.40 | 0.034 |
| <b>Helt</b>      | NM_173789 | TRCN0000095915 | CCGGCATTATCTCAATCTGAT | 2.40 | 0.041 |
| <b>Cic</b>       | NM_027882 | TRCN0000082012 | CCGACATTGATCTCAAGTGCA | 2.40 | 0.054 |
| <b>Pklr</b>      | NM_013631 | TRCN0000024943 | GTGGGTGACTACCACAATAT  | 2.40 | 0.053 |
| <b>Mrps17</b>    | NM_025450 | TRCN0000099207 | TGATTGGTACAGCCATGATAA | 2.39 | 0.169 |
| <b>Pgd</b>       | NM_025801 | TRCN0000042062 | CCTGATTGAAATCACTGCTAA | 2.39 | 0.051 |
| <b>Fgf23</b>     | NM_022657 | TRCN0000067484 | CTGCTGCATTTCTACACTGTT | 2.39 | 0.023 |
| <b>Cnm3</b>      | NM_053186 | TRCN0000077843 | GCTGGAAATGGACAAGCGTTT | 2.39 | 0.007 |
| <b>Irf7</b>      | NM_016850 | TRCN0000077289 | CTTCGACTTCAGCACTTTCTT | 2.38 | 0.046 |
| <b>Ptp4a2</b>    | NM_008974 | TRCN0000029000 | CTCTTATGAGAACATGCGTTT | 2.38 | 0.023 |
| <b>Mgat4c</b>    | NM_026243 | TRCN0000093827 | CCATCAAGAAAGTCATAGCAT | 2.38 | 0.038 |
| <b>Nfatc2ip</b>  | NM_010900 | TRCN0000099154 | GAAGTGAACAAGCGTCTCCAA | 2.37 | 0.003 |
| <b>Dusp1</b>     | NM_013642 | TRCN0000029019 | CCAAGGAGGATATGAAGCGTT | 2.36 | 0.009 |
| <b>S100a10</b>   | NM_009112 | TRCN0000097667 | GAAACCATGATGCTTACGTTT | 2.36 | 0.031 |
| <b>Pfkl</b>      | NM_008826 | TRCN0000012541 | GCTCAGCGTTTCCAATATCAT | 2.35 | 0.021 |
| <b>Dusp13</b>    | NM_013849 | TRCN0000081028 | GCCTCTGCTGTTTCCAGAGAT | 2.35 | 0.005 |
| <b>Prkaa2</b>    | XM_131633 | TRCN0000024046 | CGCCAGTCTTATCACTGCTTT | 2.35 | 0.012 |
| <b>Rhot2</b>     | NM_145999 | TRCN0000077640 | GCTACCATATACAAGCGTTAT | 2.34 | 0.003 |
| <b>Dnmt3a</b>    | NM_007872 | TRCN0000039037 | CCAGAACTGTAAGAACTGCTT | 2.34 | 0.007 |
| <b>Naaladl1</b>  | XM_355137 | TRCN0000087630 | GAGCTTGCCTAATGAAACCTT | 2.33 | 0.026 |
| <b>Zfp775</b>    | NM_173429 | TRCN0000081546 | GCCAGTTCATCTGCAATGATT | 2.33 | 0.027 |
| <b>Prkaca</b>    | NM_008854 | TRCN0000012458 | CCTGTGTTTATCCCTCTCGTA | 2.33 | 0.002 |
| <b>Pib5pa</b>    | NM_172439 | TRCN0000081472 | GCCCAGTTCATTCTGCAGTTT | 2.33 | 0.005 |
| <b>Entpd1</b>    | NM_009848 | TRCN0000028895 | CCTTGGTTTACCTCTATCTT  | 2.33 | 0.001 |
| <b>Sesn3</b>     | NM_030261 | TRCN0000088250 | CCAGTTCTACATGCTGCGTAT | 2.33 | 0.001 |
| <b>Pabpc1</b>    | NM_008774 | TRCN0000054948 | CCATCGACAATAAAGCACTAT | 2.32 | 0.040 |
| <b>Ttk</b>       | NM_009445 | TRCN0000028771 | GCCACTGATGAAATGAAATAT | 2.32 | 0.042 |
| <b>Fez2</b>      | NM_199448 | TRCN0000054633 | CCATACAAGGACCTTGCATTT | 2.32 | 0.012 |
| <b>Pet112l</b>   | NM_144896 | TRCN0000103343 | GCACAGCTTTGCGTTACTGAA | 2.31 | 0.002 |
| <b>Gm1238</b>    | XM_356827 | TRCN0000067227 | GTGTGCTTTATAGCAGCGTTT | 2.31 | 0.034 |
| <b>Pptc7</b>     | NM_177242 | TRCN0000080893 | CCGACATTTAATTCCTGCTAA | 2.31 | 0.001 |
| <b>Clu</b>       | NM_013492 | TRCN0000079924 | CCAGGGAGTGAAGCACATAAA | 2.31 | 0.043 |
| <b>Syng4</b>     | NM_021482 | TRCN0000093524 | CCTCTCTACTAACTGATGGTT | 2.31 | 0.030 |
| <b>Il7r</b>      | NM_008372 | TRCN0000065420 | TCTGCTTAATTCAGCTGTTT  | 2.30 | 0.028 |
| <b>Hba-x</b>     | NM_010405 | TRCN0000105587 | GCCTACATCCTGCGTGTGGAT | 2.30 | 0.040 |
| <b>Pelil</b>     | NM_023324 | TRCN0000077349 | CGGTCAACTGAAAGTCCTATT | 2.30 | 0.025 |

|                  |           |                |                        |      |       |
|------------------|-----------|----------------|------------------------|------|-------|
| <b>Tbx5</b>      | NM_011537 | TRCN0000084628 | CGGTTCAAAGAACACTGCGTT  | 2.30 | 0.002 |
| <b>Nkx3-1</b>    | NM_010921 | TRCN0000084944 | CGTGTATACTAGCTATCCCTA  | 2.29 | 0.006 |
| <b>Tgn</b>       | NM_009375 | TRCN0000088957 | CCATCCATCAAGCACTTTGAT  | 2.29 | 0.054 |
| <b>Hist1h1b</b>  | NM_020034 | TRCN0000096931 | CTCATCACTAAGGCTGTTTCT  | 2.29 | 0.023 |
| <b>Cd274</b>     | NM_021893 | TRCN0000067999 | CAGGCGTTTACTGCTGCATAA  | 2.28 | 0.004 |
| <b>Fut1</b>      | NM_008051 | TRCN0000093693 | AGGCAGGTTTGGAACCAGAT   | 2.28 | 0.001 |
| <b>S100a4</b>    | NM_011311 | TRCN0000011861 | CATGATGTGCAATGAATTCTT  | 2.28 | 0.049 |
| <b>Psmc6</b>     | NM_025959 | TRCN0000065822 | GCAGGACCTATTACAAAGCAT  | 2.28 | 0.007 |
| <b>Gimap4</b>    | NM_174990 | TRCN0000101061 | CCTTTATCTTCAACCAGTTTA  | 2.27 | 0.054 |
| <b>Cbfa2t3h</b>  | NM_009824 | TRCN0000096432 | CTGACTGTCATCAACCAGCAA  | 2.27 | 0.020 |
| <b>Inhbc</b>     | NM_010565 | TRCN0000067828 | CCTCACCTTGACAAGTCAGTA  | 2.27 | 0.054 |
| <b>Synpr</b>     | NM_028052 | TRCN0000093205 | CTCAGCATTGACATAGCGTTT  | 2.26 | 0.011 |
| <b>Grap</b>      | NM_027817 | TRCN0000097068 | CACGCTAAGATCCTGAACAT   | 2.26 | 0.050 |
| <b>Pigc</b>      | NM_026078 | TRCN0000077124 | GCCTTCATTATGGTGACGTTT  | 2.26 | 0.046 |
| <b>Rab15</b>     | NM_134050 | TRCN0000093170 | CCAGACTATCACAAAGCAGTA  | 2.26 | 0.055 |
| <b>Il15</b>      | NM_008357 | TRCN0000066672 | GCTACTTGTGTTTCCTTCTAA  | 2.26 | 0.013 |
| <b>Tcfap2e</b>   | NM_198960 | TRCN0000086225 | CTCGGGACTTGGTTACGTTT   | 2.24 | 0.019 |
| <b>Dph2</b>      | NM_026344 | TRCN0000076014 | CCTGACCAGTTACTAGGAGAT  | 2.24 | 0.048 |
| <b>Ehd1</b>      | NM_010119 | TRCN0000093338 | CGACTTCCCAAGCCTGCGTAA  | 2.23 | 0.025 |
| <b>Serpinb3c</b> | NM_201363 | TRCN0000080060 | CCTGTCCTGATGGTGAAACAA  | 2.23 | 0.008 |
| <b>Irak2</b>     | NM_172161 | TRCN0000022499 | CCCAGTCTAAGTATTGCAGTA  | 2.23 | 0.046 |
| <b>C5ar1</b>     | NM_007577 | TRCN0000026619 | GCTCACTCTAAACATCTGCTA  | 2.23 | 0.049 |
| <b>Cd33</b>      | NM_021293 | TRCN0000094368 | AGCTCAATGTTACCCGGAAAT  | 2.23 | 0.018 |
| <b>Dph1</b>      | NM_144491 | TRCN0000076024 | CCAACCCTAATATACCTGCTT  | 2.22 | 0.003 |
| <b>Rcbtb2</b>    | NM_134083 | TRCN0000077425 | GCAGAAATGGACCACGATCTT  | 2.22 | 0.047 |
| <b>Morn2</b>     | NM_194269 | TRCN0000078912 | GTACACTGGAAATTTCAATGA  | 2.22 | 0.053 |
| <b>Rce1</b>      | NM_023131 | TRCN0000031473 | CCGCTGTTATCAAGCGGCGTT  | 2.22 | 0.002 |
| <b>Gp9</b>       | NM_018762 | TRCN0000100053 | TGGCCAACAATAGCCTGCGTT  | 2.21 | 0.006 |
| <b>Ube3a</b>     | NM_011668 | TRCN0000012895 | CCTTCCTGAATGCACTTGTAT  | 2.21 | 0.027 |
| <b>Tnfsf7</b>    | NM_011617 | TRCN0000066684 | GTGGTGTTTATTACTGTGTTT  | 2.21 | 0.010 |
| <b>Zfp51</b>     | NM_009558 | TRCN0000096299 | TCCAGTATTCTATCTGCTTAT  | 2.21 | 0.021 |
| <b>Sfpil</b>     | NM_011355 | TRCN0000009498 | CGGATGTGCTTCCCTTATCAA  | 2.21 | 0.020 |
| <b>Ebf3</b>      | NM_010096 | TRCN0000081568 | CGAGGATATGACTAGGTGAAT  | 2.21 | 0.053 |
| <b>Slc2a5</b>    | NM_019741 | TRCN0000079390 | CCAATCGTTTGAGCTAATAA   | 2.21 | 0.005 |
| <b>Uchl1</b>     | NM_011670 | TRCN0000008443 | GCTGTCTTCTTGCGTTCTACA  | 2.20 | 0.005 |
| <b>Ubp1</b>      | NM_013699 | TRCN0000086551 | CCCACTGGTATCCACATTCTT  | 2.20 | 0.040 |
| <b>Ube2g1</b>    | NM_025985 | TRCN0000040583 | GCCAGAAAGTTCTCAAATCAT  | 2.20 | 0.013 |
| <b>Mmp27</b>     | XM_134619 | TRCN0000087679 | CCACTGACGTTTACCAGGATA  | 2.20 | 0.048 |
| <b>Npr1</b>      | NM_008727 | TRCN0000028829 | GCGACTCAACATCACAGTAAA  | 2.19 | 0.042 |
| <b>Rab10</b>     | NM_016676 | TRCN0000100835 | GCCTATTAACCTGTCAGTTAAT | 2.19 | 0.014 |
| <b>Atp2c1</b>    | NM_175025 | TRCN0000101427 | GCCAGTGGATAAAGATGTCAT  | 2.19 | 0.025 |
| <b>Mrpl24</b>    | NM_026591 | TRCN0000098770 | CTCTCCAAGTGCTTGCATTT   | 2.18 | 0.001 |
| <b>Slc35b4</b>   | NM_021435 | TRCN0000068662 | GCATGGTGGTTACTAGGTATT  | 2.18 | 0.044 |
| <b>Pspc1</b>     | NM_025682 | TRCN0000102470 | CCCATCATTGTGAATGTTGAA  | 2.18 | 0.022 |
| <b>Pacsin3</b>   | NM_028733 | TRCN0000088780 | GCAGAGGATGGTTCCGTAAA   | 2.18 | 0.003 |
| <b>Notch2</b>    | NM_010928 | TRCN0000025896 | GCTCCGACTATGTCAACAGTT  | 2.17 | 0.044 |
| <b>Birc3</b>     | NM_007464 | TRCN0000012299 | CCTGCGTTATACAGAGATATA  | 2.17 | 0.024 |
| <b>Pb1</b>       | NM_025847 | TRCN0000081821 | CGGGATGTCCATTTGTCCAAA  | 2.17 | 0.043 |
| <b>Trhr</b>      | NM_013696 | TRCN0000027770 | GCCCAGTTTCTCTGCACGTTT  | 2.17 | 0.030 |
| <b>Cd24a</b>     | NM_009846 | TRCN0000077031 | GTAACCAGAATATTTCTGCTT  | 2.17 | 0.011 |
| <b>Mad2l1</b>    | NM_019499 | TRCN0000012838 | CCAGGATATAAAGAAGCGTTT  | 2.16 | 0.013 |

|                 |              |                |                        |      |       |
|-----------------|--------------|----------------|------------------------|------|-------|
| <b>Cul4b</b>    | NM_028288    | TRCN0000012792 | CCATATAATTGATACCTGCTT  | 2.15 | 0.018 |
| <b>Traf6</b>    | NM_009424    | TRCN0000040735 | CCCAGGCTGTTTCATAATGTTA | 2.15 | 0.038 |
| <b>Ppie</b>     | NM_019489    | TRCN0000101091 | AGGTTCTTCATGCTGCATTTA  | 2.15 | 0.004 |
| <b>Syngn3</b>   | NM_011522    | TRCN0000093260 | GCGCTGCGTCTTCAACGGAAA  | 2.15 | 0.024 |
| <b>Bst1</b>     | NM_009763    | TRCN0000099630 | GCATTCATCTAGTCCTGCTTA  | 2.15 | 0.008 |
| <b>Cst9</b>     | NM_009979    | TRCN0000080160 | GCTGCGTAGAACCATATGCAA  | 2.15 | 0.010 |
| <b>RbmX</b>     | NM_011252    | TRCN0000104041 | CCACTAAAGACAGCTATTCAA  | 2.14 | 0.028 |
| <b>Ifng</b>     | NM_008337    | TRCN0000077057 | CAGTCATTGAAAGCCTAGAAA  | 2.14 | 0.010 |
| <b>Mall</b>     | NM_145532    | TRCN0000100630 | CGACAGTCCAACCATCTAAAT  | 2.14 | 0.040 |
| <b>Lats2</b>    | NM_015771    | TRCN0000022708 | CGACCTGGATGGTCATATTA   | 2.14 | 0.024 |
| <b>Myrip</b>    | NM_144557    | TRCN0000091473 | CCTGCCAAATTCAACAAGATT  | 2.13 | 0.041 |
| <b>Manba</b>    | NM_027288    | TRCN0000077412 | CGTGAAGTGGTTCCACGTA    | 2.13 | 0.046 |
| <b>Pcdha7</b>   | NM_009957    | TRCN0000094547 | GAGCCAACAATTACTCCTGTT  | 2.13 | 0.027 |
| <b>Nfatc2</b>   | NM_010899    | TRCN0000012356 | GCCCGTGAAAGTCAACTTCTA  | 2.12 | 0.032 |
| <b>Rbp4</b>     | NM_011255    | TRCN0000105631 | GAAGTTCGACAAGGCTCGTTT  | 2.12 | 0.007 |
| <b>Cox8b</b>    | NM_007751    | TRCN0000076513 | GCTGCTCCAAGCGCCTGCGAA  | 2.11 | 0.024 |
| <b>Anapc7</b>   | NM_019805    | TRCN0000088343 | CCTGCCTGTTTCCAAGTAGTA  | 2.11 | 0.040 |
| <b>Tekt3</b>    | NM_027660    | TRCN0000089893 | CGAGTCAATGACTTAGCGTTT  | 2.11 | 0.018 |
| <b>Krr1</b>     | NM_178610    | TRCN0000102258 | CGAACCTTGTTCCCGAAATA   | 2.09 | 0.036 |
| <b>Adam5</b>    | NM_007401    | TRCN0000032509 | CAAGTATTGCTACCCCAAAG   | 2.08 | 0.051 |
| <b>Sifn1</b>    | NM_011407    | TRCN0000088233 | GCTGGCAATTGGAATACGTTT  | 2.08 | 0.030 |
| <b>Dkk4</b>     | NM_145592    | TRCN0000071651 | AGGGAAATTCTGCTTAGCGTT  | 2.08 | 0.002 |
| <b>Zfp672</b>   | NM_178761    | TRCN0000085263 | CCTGTTAATCTCTACTGCTTT  | 2.08 | 0.004 |
| <b>C1qc</b>     | NM_007574    | TRCN0000066651 | CTTCTCTGGTTTCTACTGTT   | 2.08 | 0.029 |
| <b>Nqo2</b>     | NM_020282    | TRCN0000041877 | CCACTATACTGGTTCAGCGTT  | 2.07 | 0.002 |
| <b>Msr2</b>     | NM_030707    | TRCN0000077317 | CCCTGTATCTCAAGTACCAT   | 2.06 | 0.052 |
| <b>Serpine2</b> | NM_009255    | TRCN0000011919 | GCATGATTGATAATCTGCTTT  | 2.06 | 0.032 |
| <b>Dusp1</b>    | NM_013642    | TRCN0000029020 | CATGAGGACTAACCGGGTAAA  | 2.06 | 0.003 |
| <b>Map3k5</b>   | NM_008580    | TRCN0000012596 | CCCATAGATATCCCTGGGTTT  | 2.06 | 0.006 |
| <b>Edg2</b>     | NM_010336    | TRCN0000028878 | CATCACTGTTTGCCTGTTT    | 2.05 | 0.004 |
| <b>Rgs19</b>    | NM_026446    | TRCN0000037166 | CCATCGCCACACACATTTGAT  | 2.05 | 0.045 |
| <b>Dbx1</b>     | NM_001005232 | TRCN0000070581 | CAGTCCCTTCAATCCGCATTT  | 2.05 | 0.027 |
| <b>Il12rb1</b>  | NM_008353    | TRCN0000067671 | GAGTTGCTACAGGGTTTCCAA  | 2.05 | 0.003 |
| <b>Slc29a3</b>  | NM_023596    | TRCN0000079739 | CCATCTTCAATAGCAGCGTTT  | 2.04 | 0.008 |
| <b>Obox3</b>    | NM_145707    | TRCN0000070914 | GAATACCAAGAATACCTGCTT  | 2.04 | 0.007 |
| <b>Irak4</b>    | NM_029926    | TRCN0000022461 | CCTGTGCTTAGTGTATGCTTA  | 2.04 | 0.026 |
| <b>Capn10</b>   | NM_011796    | TRCN0000030706 | CCCATTGGTTTCCATGTCTTT  | 2.04 | 0.006 |
| <b>Prodh</b>    | NM_011172    | TRCN0000041928 | GCAGCAGAGATCGGTTATGAA  | 2.03 | 0.025 |
| <b>Heg1</b>     | NM_175256    | TRCN0000097250 | CGGGACAGTATAACCCATCTT  | 2.03 | 0.018 |
| <b>Dusp9</b>    | NM_029352    | TRCN0000081018 | GCCCTTCTTGCTGTTTCATTT  | 2.03 | 0.004 |
| <b>Dnaja4</b>   | NM_021422    | TRCN0000008535 | CGCTTTAATAGCCTCACGTTT  | 2.03 | 0.001 |
| <b>Rnf6</b>     | NM_028774    | TRCN0000054814 | GCTCACTTCTTCTACTGAAT   | 2.03 | 0.027 |
| <b>Klk1b21</b>  | NM_010642    | TRCN0000031778 | CCACTGCTATGGCAACCAGTA  | 2.03 | 0.045 |
| <b>Cox11</b>    | NM_199008    | TRCN0000076728 | GCACCTTCATTTATCCCACTT  | 2.02 | 0.019 |
| <b>Akr1c21</b>  | NM_029901    | TRCN000004224  | GATGCTGGTTTCCATCACTTT  | 2.02 | 0.013 |
| <b>PorcN</b>    | NM_016913    | TRCN000009349  | GCTGCTTCTTACCATCTGCTT  | 2.02 | 0.002 |
| <b>Oas1c</b>    | NM_033541    | TRCN000007591  | GTCGCCTATTACAAGAATCTT  | 2.01 | 0.042 |
| <b>Bnip3</b>    | NM_009760    | TRCN000000969  | GCATGAGAAACACAAGCGTTA  | 2.01 | 0.004 |
| <b>Smad1</b>    | NM_008539    | TRCN000002588  | CCCATTTGGTTCCAAGCAGAA  | 2.01 | 0.029 |
| <b>Pcdhb4</b>   | NM_053129    | TRCN0000094918 | CAGAGACTGTGCTTGCAGTTT  | 2.01 | 0.018 |
| <b>Slc34a2</b>  | NM_011402    | TRCN0000069546 | CGGACAGTTCCTCAGCAACAA  | 2.01 | 0.049 |

|                |           |                |                       |      |       |
|----------------|-----------|----------------|-----------------------|------|-------|
| <b>Ccl21c</b>  | NM_023052 | TRCN0000067749 | CCTTAAGTACAGCCAGAAGAA | 2.01 | 0.029 |
| <b>Gyk</b>     | NM_008194 | TRCN0000024656 | CCATTGATTCATGGCTTATTT | 2.00 | 0.047 |
| <b>Foxd4</b>   | NM_008022 | TRCN0000084901 | CCGCAGGTTCCCGGACAATAT | 2.00 | 0.001 |
| <b>Snx9</b>    | NM_025664 | TRCN0000093362 | CACAGATATAAGCACTTTGAT | 2.00 | 0.048 |
| <b>Atf7</b>    | NM_146065 | TRCN0000086246 | GCAGCTACTGTTAGCTCATAA | 2.00 | 0.011 |
| <b>Trappc4</b> | NM_021789 | TRCN0000100671 | CCTTGAAATGCCTATCAGAT  | 2.00 | 0.037 |
